# Supplementary material for: Effects of acute alcohol consumption on emotion recognition in high and low trait aggressive drinkers
Source: PubMed Central journal article supplement (PMC7604882; doi:10.1177/0269881120922951), 2020-05-29
Supplement: 2020.01.24_Alc_and_Emo_supplementary_materials.pdf [file 2020.01.24_Alc_and_Emo_supplementary_materials.pdf]

# Supplementary materials

## Pre-registered analyses

To investigate processing accuracy of angry and sad faces following and acute dose of alcohol, emotion specific hit rates and false alarms were analysed using 2 drink (alcohol, placebo) × 2 aggression (high, low) mixed ANOVAs; two for anger and two for sadness. In addition, 6AFC hit rates were also analysed using an exploratory 2 drink (alcohol, placebo) × 2 trait aggression (high, low) × 5 emotion (angry, sad, happy, disgust, fear) mixed model ANOVA.

*Emotion specific hits.* There was no evidence of a main effect of drink for anger ( $F [1, 83] = .44, p = .510, \eta_p^2 = .005$ ) or sadness ( $F [1, 83] = 1.78, p = .185, \eta_p^2 = .021$ ). There was also no evidence of a main effect of trait aggression for anger ( $F [1, 83] = 2.11, p = .150, \eta_p^2 = .025$ ), but there was weak evidence of main effect for sadness ( $F [1, 83] = 3.25, p = .075, \eta_p^2 = .038$ ) indicating more hits in the low trait aggressive group. There was also no evidence of drink by trait aggression interactions for anger ( $F [1, 83] = .44, p = .510, \eta_p^2 = .005$ ) or sadness ( $F [1, 83] = .00, p = .956, \eta_p^2 = .000$ ).

*Emotion specific false alarms.* There was no evidence of a main effect of drink for anger ( $F [1, 83] = .01, p = .919, \eta_p^2 = .000$ ) or sadness ( $F [1, 83] = 1.23, p = .270, \eta_p^2 = .015$ ). There was also no evidence of a main effect of trait aggression for anger ( $F [1, 83] = 1.10, p = .297, \eta_p^2 = .013$ ) or sadness ( $F [1, 83] = .00, p = .999, \eta_p^2 = .000$ ). There was also no evidence for a drink by trait aggression interaction for anger ( $F [1, 83] = .57, p = .452, \eta_p^2 = .007$ ) or sadness ( $F [1, 83] = .04, p = .849, \eta_p^2 = .000$ ).

*Exploratory hits by emotion.* There was evidence of main effect of drink ( $F [1, 83] = 10.57, p = .002, \eta_p^2 = .113$ ), and emotion ( $F [2.92, 242.47] = 225.40, p < .001, \eta_p^2 = .731$ ). There was no evidence of a main effect of trait aggression ( $F [1, 83] = .50, p = .482, \eta_p^2 = .006$ ), drink by trait aggression interaction ( $F [1, 83] = 1.30, p = .258, \eta_p^2 = .015$ ), emotion by trait aggression interaction ( $F [2.92, 242.47] = 1.07, p = .361, \eta_p^2 = .013$ ), or drink by emotion interaction ( $F [3.19, 264.77] = 1.89, p = .127, \eta_p^2 = .022$ ). There was also no evidence of a three-way interaction between drink, emotion and trait aggression ( $F [3.19, 264.77] = 1.53, p = .204, \eta_p^2 = .018$ ).

**Commented [AE1]:** The study protocol was pre-registered on the Open Science Framework (doi: [10.17605/OSF.IO/YV392](https://doi.org/10.17605/OSF.IO/YV392)).

15) In response to reviewers' comments, analyses have been conducted in accordance with the pre-registered protocol.
